# Supplementary material for: Bismuth single-atom alloying of palladium nanosheets promotes selective electrochemical valorization of glycerol to C3 products
Source: Royal Society of Chemistry journal article supplement (doi:10.1039/d4ta03892d), 2024-01-01
Supplement: d4ta03892d1.pdf [file d4ta03892d1.pdf]

## Supporting Information

### **Bismuth Single-Atom Alloying of Palladium Nanosheets Promotes Selective Electrochemical Valorization of Glycerol to C<sub>3</sub> Products**

Zhenghao Mao<sup>ab‡</sup>; Lin Jia<sup>ab‡</sup>, Xinnan Mao<sup>ab‡</sup>, Xue Ding<sup>ab</sup>, Binbin Pan<sup>ab</sup>, Tianran Yan<sup>ab</sup>, Jie Xu<sup>d</sup>, Liang Zhang<sup>ab</sup>, Lu Wang<sup>\*ab</sup>, Na Han<sup>\*ab</sup>, and Yanguang Li<sup>\*abc</sup>

<sup>a</sup> Institute of Functional Nano & Soft Materials (FUNSOM), Soochow University, Suzhou, 215123 China.

<sup>b</sup> Jiangsu Key Laboratory for Advanced Negative Carbon Technologies, Soochow University, Suzhou 215123, China

<sup>c</sup> Macao Institute of Materials Science and Engineering (MIMSE), MUST–SUDA Joint Research Center for Advanced Functional Materials, Macau University of Science and Technology, Taipa 999078, Macau SAR, China

<sup>d</sup> College of Chemistry and Materials Engineering, Wenzhou University, Wenzhou 325035, China

‡ These authors contributed equally.

Correspondence to: [yanguang@suda.edu.cn](mailto:yanguang@suda.edu.cn); [hanna@suda.edu.cn](mailto:hanna@suda.edu.cn); [lwang22@suda.edu.cn](mailto:lwang22@suda.edu.cn)

## Experimental methods

### Chemicals

All chemicals were purchased and used without further purification. Palladium(II) acetylacetonate ( $\text{Pd}(\text{acac})_2$ , Pd 34.9%), ethylene glycol ( $\text{C}_2\text{H}_6\text{O}_2$ ,  $\geq 99.5\%$ ), bismuth chloride ( $\text{BiCl}_3$ , AR) and *N,N*-dimethylformamide (DMF,  $\geq 99.9\%$ ) were purchased from Shanghai Macklin Biochemical Co., Ltd. Cetyltrimethylammonium bromide (CTAB,  $\geq 99\%$ ), polyvinylpyrrolidone (PVP,  $M_w = 30000$ ), glycerol ( $\text{C}_3\text{H}_8\text{O}_3$ ,  $\geq 99.9\%$ ) and potassium hydroxide (KOH) were purchased from Sigma-Aldrich Shanghai Trading Co., Ltd. Ketjenblack electroconductive carbon black (KB, Carbon ECP 200L) was purchased from Lion Specialty Chemicals Co., Ltd. Commercial Pd/C (20 wt% palladium on Vulcan XC72) was purchased from Premetek Co. Perfluorinated resin solution (Nafion 1100EW, 5 wt.% in lower aliphatic alcohols and water, contains 15-20% water) was purchased from Sigma-Aldrich. Deionized water was prepared with a Milli-Q purification system and used throughout all the experiments.

### Material synthesis

#### Preparation of Pd NS

Pd NS was prepared using a solvothermal method. In brief, 10 mg of  $\text{Pd}(\text{acac})_2$ , 34 mg of PVP and 37 mg of CTAB were dissolved in a mixture of 10 mL of DMF and 2 mL of distilled water. The resultant homogeneous solution was transferred to a glass pressure vessel and charged with CO to 1 bar. The solution was then heated at 100 °C for 3 h in an oil bath. At the end of the reaction, the solid product was collected, washed with a mixture of ethanol and acetone for at least three times, and finally vacuum dried to yield Pd NS.

#### Preparation of $\text{Bi}_1\text{Pd}$ NS

To prepare Bi<sub>1</sub>Pd NS, 3 mg of Pd NS was dispersed in 10 mL of ethylene glycol within a flask, and then heated to 80 °C in an oil bath. After the addition of 5 mg of BiCl<sub>3</sub>, the solution was further magnetically stirred for 30 min. The solid product was collected by centrifugation, washed with a mixture of ethanol and acetone for at least three times, and finally vacuum dried to yield Bi<sub>1</sub>Pd NS.

### **Structural characterizations**

XRD was performed on a PANalytical X-ray diffractometer with monochromatic Cu K $\alpha$  radiation. TEM images and EDS mapping were carried on an FEI Talos transmission electron microscope equipped with a Super-X EDS detector and operated at an accelerating voltage of 200 kV. Atomic-resolution HAADF-STEM images were taken using a Thermo Fisher Themis Z microscope equipped with two aberration correctors at an operation voltage of 300 kV. XPS results were obtained on an Ultra DLD X-ray photoelectron spectrometer. Bi *L*<sub>3</sub>-edge and Pd *K*-edge XANES and EXAFS spectra were collected at the beamline 13SSW of Shanghai Synchrotron Radiation Facility. Pd *K*-edge XANES spectra were collected from ~200 eV below to ~800 eV above the Pd *K*-edge in the transmission mode. Bi *L*<sub>3</sub>-edge XANES and EXAFS spectra were collected from ~200 eV below to ~800 eV above the Bi *L*<sub>3</sub>-edge in the fluorescence mode.

### **Electrochemical measurements**

**H-cell measurements:** For the preparation of the working electrodes, 1 mg of Bi<sub>1</sub>Pd NS, 0.5 mg of Ketjenblack carbon, and 7.5  $\mu$ L of 5 wt% Nafion solution were dispersed in 250  $\mu$ L of ethanol and 60  $\mu$ L of deionized water. The mixture was sonicated for 30 min to form a uniform catalyst ink. The ink was then dropcast onto a 1 $\times$ 1 cm<sup>2</sup> carbon fiber paper (AvCarb P75T) and dried on a hot plate to achieve a catalyst loading of 1 mg cm<sup>-2</sup>. The working electrodes of Pd NS and commercial 20 wt% Pd/C (Premetek Co.) were prepared similarly at

the same precious metal loading. H-cell measurements were conducted in a three-electrode configuration with the catalyst-loaded working electrode and a saturated calomel reference electrode (SCE) in the anodic compartment, and a Pt foil counter electrode in the cathodic compartment. The two compartments were separated by an anion exchange membrane (Fumasep FAA-3-PK-130). The anolyte was 30 mL of 1 M KOH + 0.5 M glycerol, and the catholyte was 30 mL of 1 M KOH. All the potential readings were measured against SCE and converted to RHE with 90%  $iR$  compensation. Polarization curves were recorded at a scan rate of 10 mV s<sup>-1</sup>. Chronoamperometric experiments were conducted at selected working potentials ranging from 0.6 V to 0.79 V.

For product quantification, the anolyte after chronoamperometric experiments was properly diluted, and analyzed by a high performance liquid chromatograph (HPLC, Thermo Scientific, UltiMate 3000) equipped with a HyperREZ XP (H<sup>+</sup>) column, a refractive index detector and an ultraviolet detector (DAD-3000,  $\lambda = 210$  nm). The FEs for different products were calculated as follows:

$$FE (\%) = \frac{N \times n_i \times F}{Q} \times 100\% \quad (1)$$

where  $N$  is the number of electron transfer during the formation of the target product (DHA, TA, GLA, LA, OA, GA or FA),  $n_i$  is the amount of product detected by HPLC based on its calibration curve,  $F = 96485$  C mol<sup>-1</sup> is the Faraday constant, and  $Q$  is the total amount of charge passed during chronoamperometric tests.

**Flow cell measurements:** For the flow cell measurements, a 0.5×2 cm<sup>2</sup> carbon fiber paper (AvCarb P75T) was loaded with Bi<sub>1</sub>Pd NS at 1 mg cm<sup>-2</sup> as the working electrode. SCE and an IrO<sub>x</sub> loaded Ti mesh were used as the reference electrode and counter electrode, respectively. The flow cell was custom-made, and its anodic chamber was separated from the cathodic chamber by an anion exchange membrane (Fumasep FAA-3-PK-130). During the

measurements, the cathodic chamber was circulated with 4 M KOH, and the anodic chamber was circulated with 4 M KOH + 2 M glycerol (unless otherwise specified) at a flow rate of 12.5 mL min<sup>-1</sup> (unless otherwise specified) using peristaltic pumps. All the potential readings were measured against SCE and converted to RHE with 90% *iR* compensation. Polarization curves were collected at a scan rate of 10 mV s<sup>-1</sup>. Chronoamperometric measurements were conducted at the selected working potential ranging from 0.6 V to 0.77 V. Liquid products in the anolyte were quantified by HPLC analysis. The short-term stability of Bi<sub>1</sub>Pd NS, Pd NS and Pd/C were evaluated at 0.71 V for 10 h by continuously circulating 400 mL of anolyte. The long-term stability of Bi<sub>1</sub>Pd NS was evaluated at 0.71 V by circulating 400 mL of anolyte for 5 h and then refreshing the electrolyte periodically.

### **GOR-CO<sub>2</sub>RR coupling**

GOR-CO<sub>2</sub>RR coupling was conducted in a two-electrode flow cell. The Bi<sub>1</sub>Pd anode was prepared in the same way as above. The Cu cathode was prepared by sputtering a 150 nm thick Cu film on a 0.5×2 cm<sup>2</sup> polytetrafluoroethylene (PTFE) membrane (450 nm pore size, from Membrane Solutions LLC (Nantong)) using a magnetron sputtering system (Quorum Q150T). The catholyte was 4 M KOH, and the anolyte was 4 M KOH + 2 M glycerol circulated at a flow rate of 12.5 mL min<sup>-1</sup> using peristaltic pumps. CO<sub>2</sub> was continuously fed to the cathode gas chamber at a flow rate of 20 sccm controlled by a digital mass flow controller. Polarization curves were collected at a scan rate of 10 mV s<sup>-1</sup>. Chronopotentiometric measurements were conducted at the current density of 100 mA cm<sup>-2</sup>, 150 mA cm<sup>-2</sup> and 200 mA cm<sup>-2</sup>. The full-cell voltages reported were recorded without *iR* correction. The oxidation products from GOR were analyzed in the same way as above. The gaseous reduction products from CO<sub>2</sub>RR were analyzed using an online gas chromatograph (GC2060, Wuhao Information Technology Shanghai Co., Ltd) equipped with a thermal conductivity detector (TCD) and a flame ionization detector (FID). The liquid products from

CO<sub>2</sub>RR were analyzed by a nuclear magnetic resonance spectrometer (400 MHz Bruker Avance NMR) with water peak suppression. The FEs of reduction products from CO<sub>2</sub>RR were calculated as follows:

$$FE_{gas} (\%) = \frac{Q_{gas}}{Q_{total}} \times 100\% = \frac{\left(\frac{v}{60 \text{ s/min}}\right) \times \left(\frac{y}{24000 \text{ cm}^3/\text{mol}}\right) \times N \times F}{i} \times 100\% \quad (2)$$

$$FE_{liquid} (\%) = \frac{Q_{liquid}}{Q_{total}} \times 100\% = \frac{N \times n_{liquid} \times F}{Q} \times 100\% \quad (3)$$

where  $v$  is the gas flow rate at the cathode outlet,  $y$  is the measured product concentration in the 1 mL sample loop based on the standard calibration curve,  $N$  is the number of electron transfer during the formation of the target product (C<sub>2</sub>H<sub>4</sub>, C<sub>2</sub>H<sub>5</sub>OH, CH<sub>3</sub>COOH and n-C<sub>3</sub>H<sub>7</sub>OH),  $j$  is the total current,  $n_{liquid}$  is the amount of liquid products. The OER-CO<sub>2</sub>RR coupling was conducted under the same conditions except for replacing an IrO<sub>x</sub> loaded Ti mesh as the anode and 4 M KOH as the anolyte.

### Theoretical calculations

All the DFT calculations were performed using the Perdew-Burke-Ernzerhof functionals (PBE) (*Phys. Rev. B* **1992**, *45*, 13244; *Phys. Rev. Lett.* **1997**, *77*, 3865) of the generalized gradient approximation (GGA) implemented in the Vienna Ab-initio Simulation Package (VASP) code (*Phys. Rev. B* **1996**, *54*, 11169; *Comput. Mater. Sci.* **1996**, *6*, 15). The projector-augmented wave (PAW) method (*Phys. Rev. B* **1993**, *47*, 558; *Phys. Rev. B* **1994**, *50*, 17953) was applied to describe the electron-ion interactions. The D<sub>3</sub> Grimme's scheme (*J. Chem. Phys.* **2010**, *132*, 154104) was adopted to account for London dispersion interactions. The kinetic energy cutoff for the plane wave expansions was set to 400 eV. The Methfessel-Paxton (MP) method was applied, and the smearing width was chosen as 0.2 eV. A 5 × 5 supercell with five atomic layers was used to simulate the face-centered Pd(111) surface. The

two bottom layers were fixed at  $a = 3.88 \text{ \AA}$ . At the first layer of Pd(111), one Pd atom was replaced by a Bi atom to simulate the Bi<sub>1</sub>Pd surface. Approximately 15 Å of vacuum space was used to avoid interactions with adjacent images. For sampling the reciprocal space, k-points of  $\Gamma$ -centered  $2 \times 2 \times 1$  were used for slab calculations. To simulate gaseous molecules, electronic structure calculations were performed in a  $15 \text{ \AA} \times 15 \text{ \AA} \times 15 \text{ \AA}$  vacuum box with a Gaussian smearing of 0.05 eV, and the  $\Gamma$ -point was adopted for sampling the Brillouin zone of the simulation cell. All structures were fully relaxed until all the forces were less than 0.03 eV Å<sup>-1</sup>.

The adsorption energy for the molecules was calculated as follows:

$$E_{\text{ads}(i)} = E_{*i} - E^* - E_i \quad (4)$$

where  $i$  stands for glycerol, GLA, TA, or DHA,  $E_{\text{ads}(i)}$  represents the adsorption energy of a specific molecule,  $E_{*i}$  represents the total energy of the slab with adsorbate,  $E^*$  represents the total energy of the slab, and  $E_i$  represents the total energy of the adsorbate in gas phase.

The charge density difference was determined using the following equation:

$$\Delta\rho = \rho_{*i} - \rho^* - \rho_i \quad (5)$$

where  $\rho_{*i}$ ,  $\rho^*$ , and  $\rho_i$  are the charge density of the adsorption intermediate, the substrate, and the adsorbed molecule, respectively.

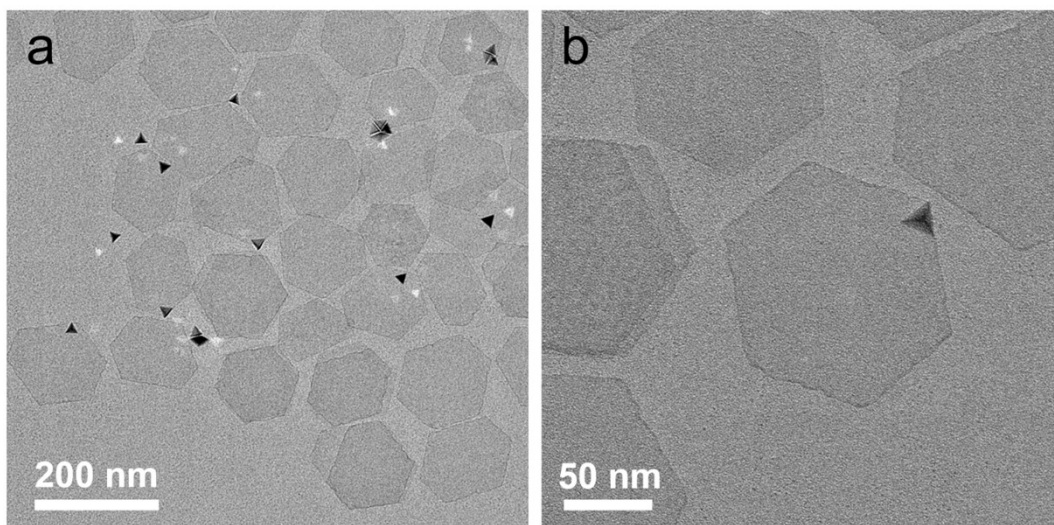

**Fig. S1** TEM images of Pd NS.



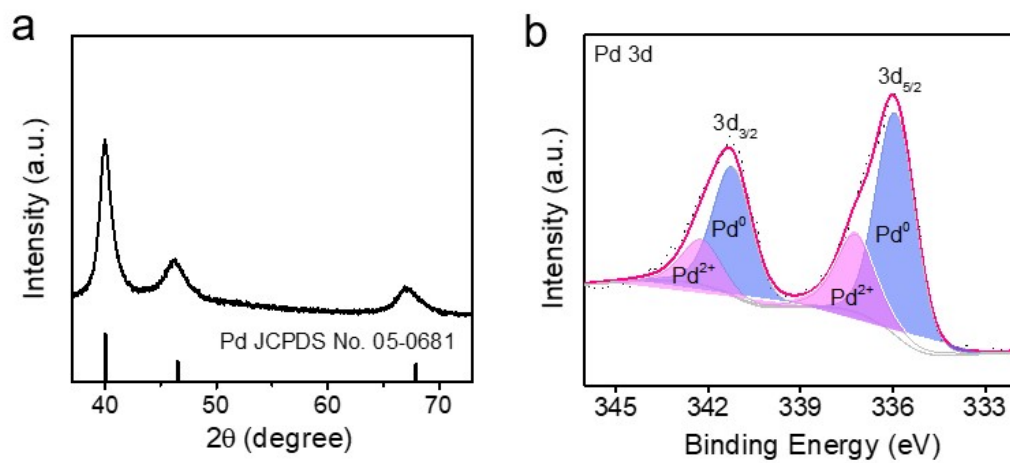

**Fig. S2** (a) XRD pattern and (b) Pd 3d XPS spectrum of Pd NS.

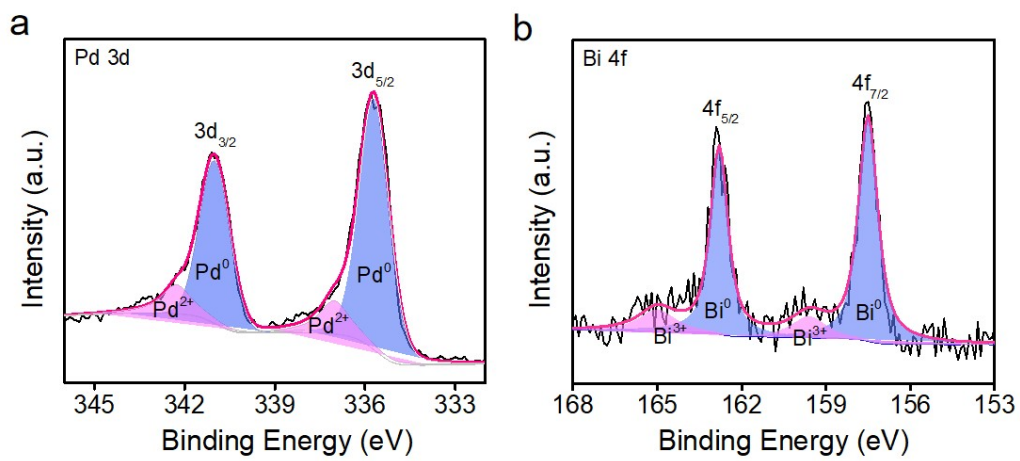

**Fig. S3** (a) Pd 3d and (b) Bi 4f XPS spectra of  $Bi_1Pd$  NS.

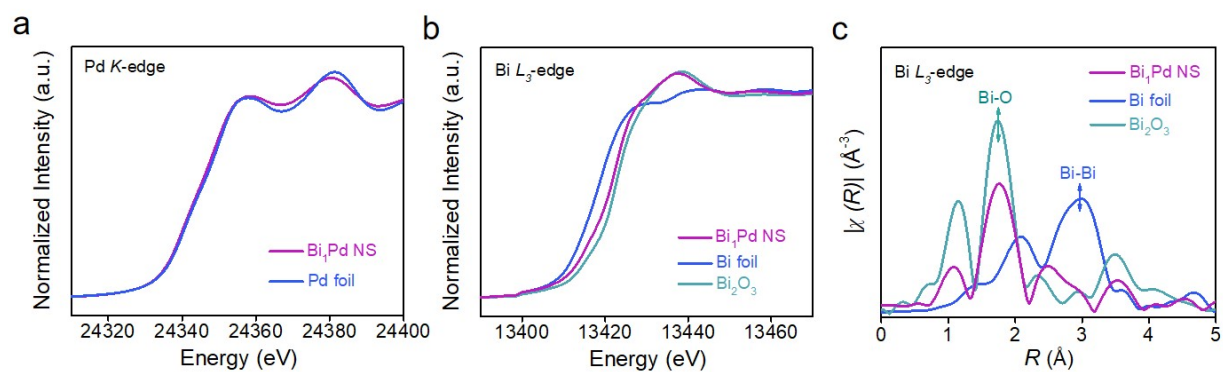

**Fig. S4** (a) Pd *K*-edge XANES spectra of Bi<sub>1</sub>Pd NS and Pd foil. (b) Bi *L*<sub>3</sub>-edge XANES spectra and (c) corresponding Fourier transform EXAFS spectra of Bi<sub>1</sub>Pd NS, Bi<sub>2</sub>O<sub>3</sub> and Bi foil references.

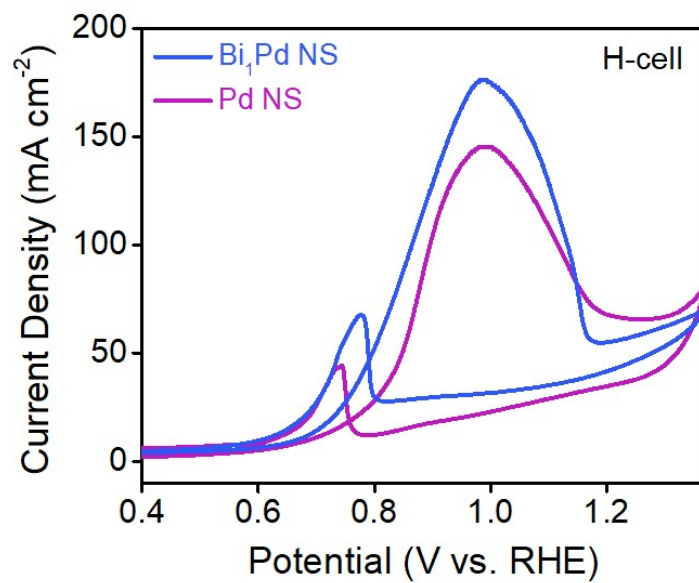

**Fig. S5** Cyclic voltammogram curves of Pd NS and Bi<sub>1</sub>Pd NS in an H cell with 1 M KOH containing 0.5 M glycerol at a scan rate of 10 mV s<sup>-1</sup>.

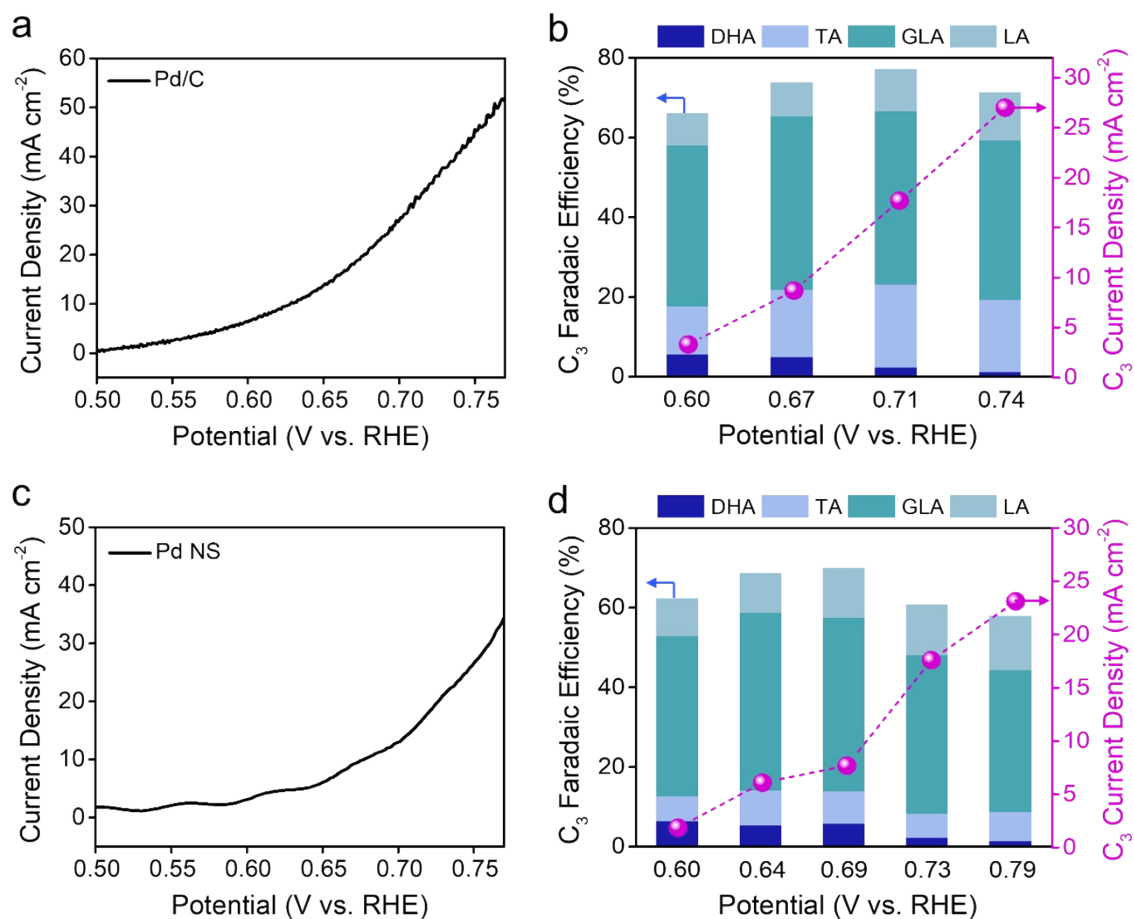

**Fig. S6** (a) Polarization curve and (b) potential-dependent C<sub>3</sub> FEs and partial current densities of Pd/C in an H-cell with 1 M KOH + 0.5 M glycerol. (c) Polarization curve and d potential-dependent C<sub>3</sub> FEs and partial current densities of Pd NS in an H-cell with 1 M KOH + 0.5 M glycerol.

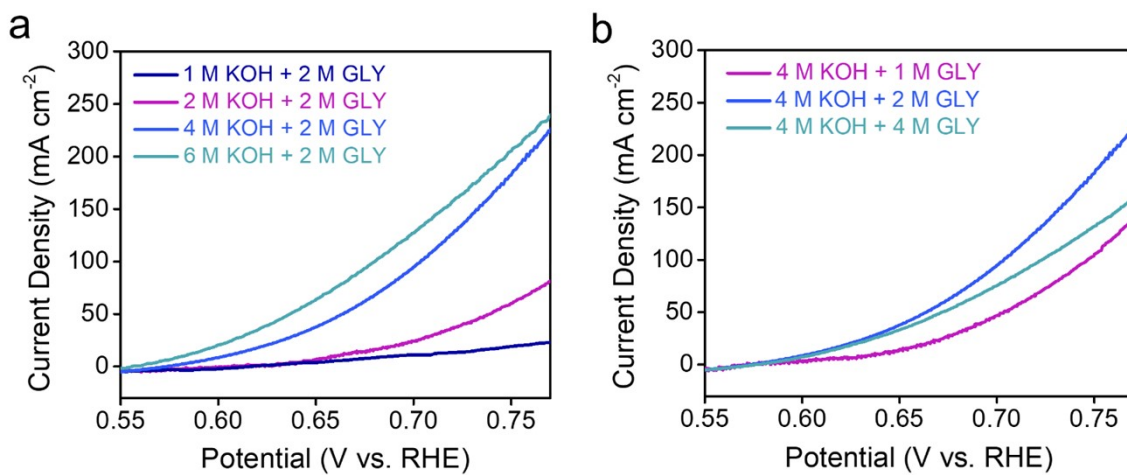

**Fig. S7** Polarization curves of Bi<sub>1</sub>Pd NS in a flow cell with (a) different concentrations of KOH solution containing 2 M glycerol and (b) 4 M KOH solution containing different concentrations of glycerol.

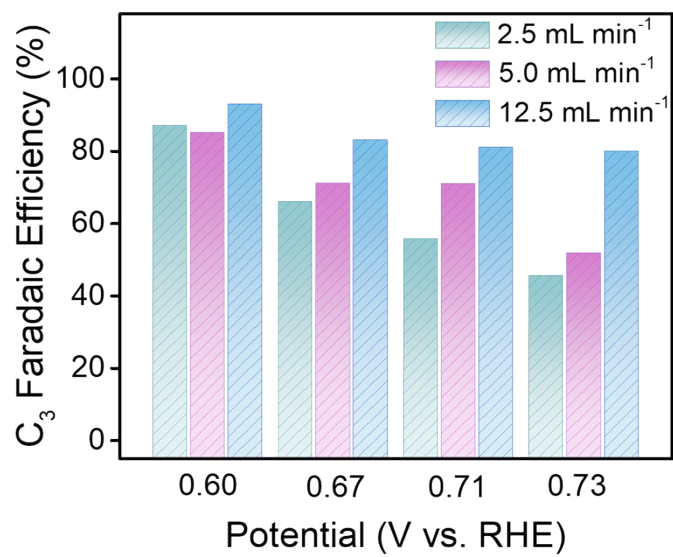

**Fig. S8** Potential-dependent C<sub>3</sub> FEs on Bi<sub>1</sub>Pd NS in the flow cell at different analyte flow rates of 2.5 mL min<sup>-1</sup>, 5 mL min<sup>-1</sup> and 12.5 mL min<sup>-1</sup>.

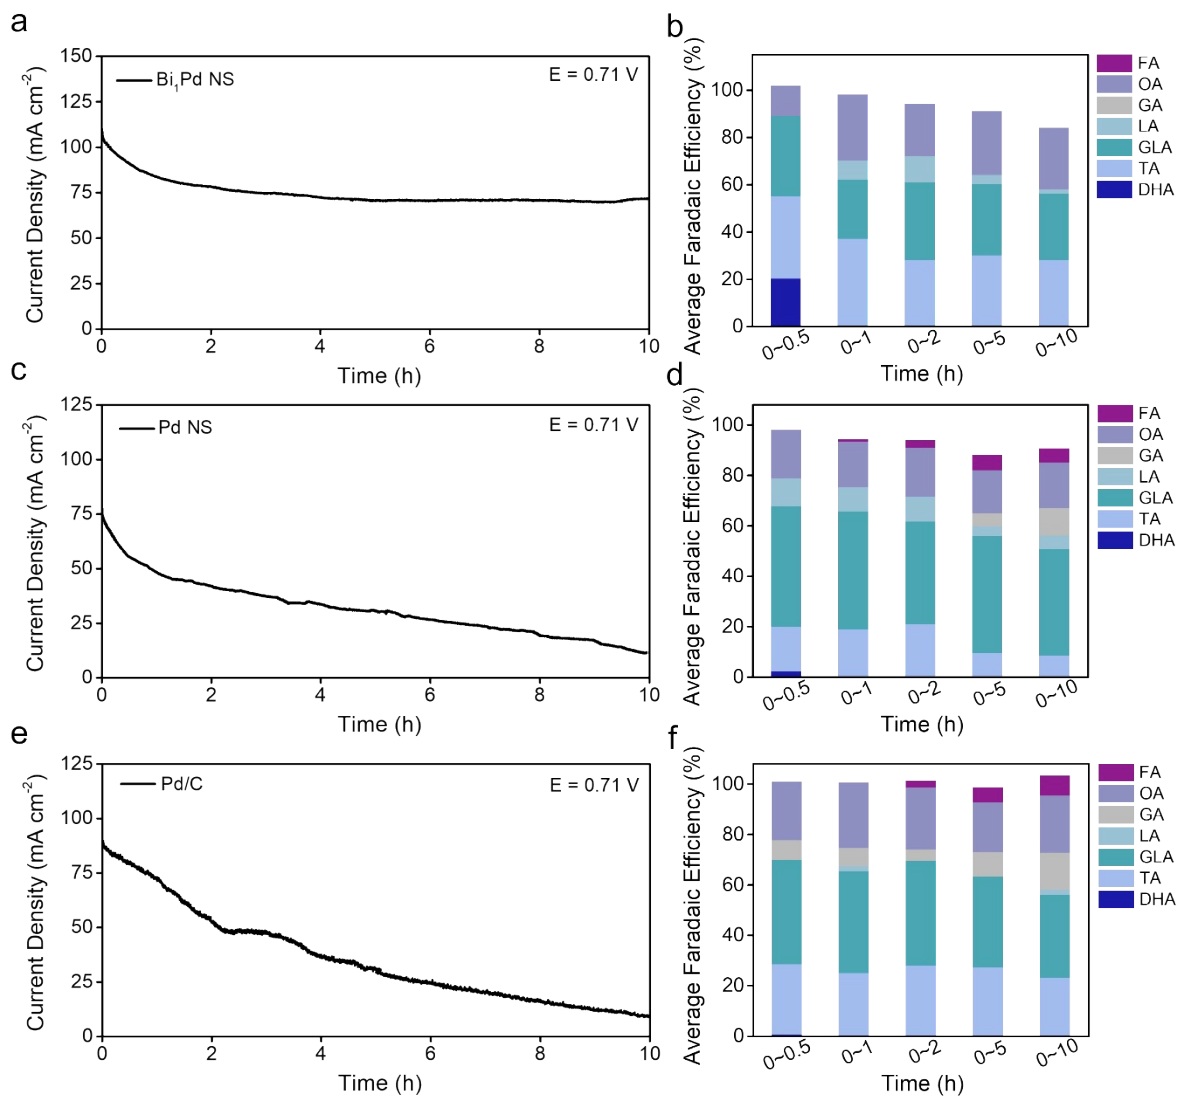

**Fig. S9** (a) Chronoamperometry curve and (b) average FE of Bi<sub>1</sub>Pd NS at 0.71 V in a flow cell with 4 M KOH + 2 M glycerol. (c) Chronoamperometry curve and (d) average FE of Pd NS at 0.71 V in a flow cell with 4 M KOH + 2 M glycerol. (e) Chronoamperometry curve and (f) average FE of Pd/C at 0.71 V in a flow cell with 4 M KOH + 2 M glycerol.



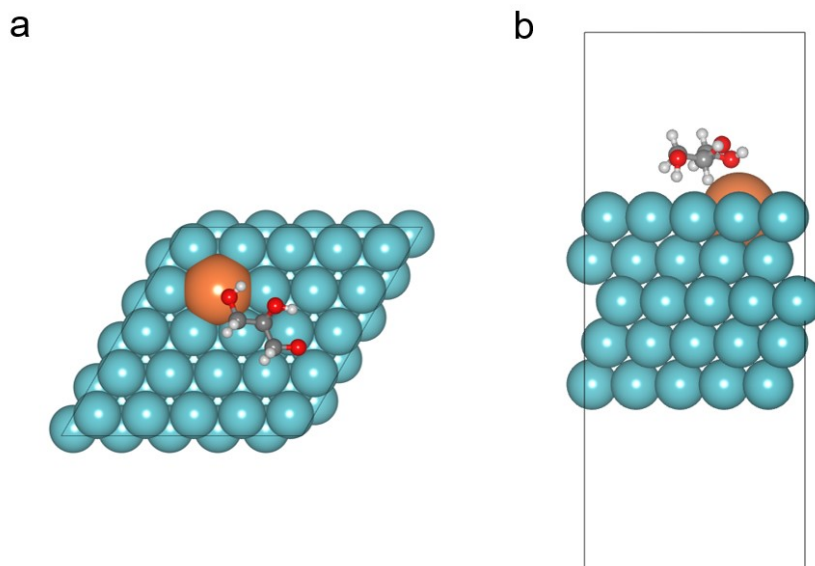

**Fig. S10** (a) Top view and (b) side view of the adsorbed glycerol on Bi<sub>1</sub>Pd NS.

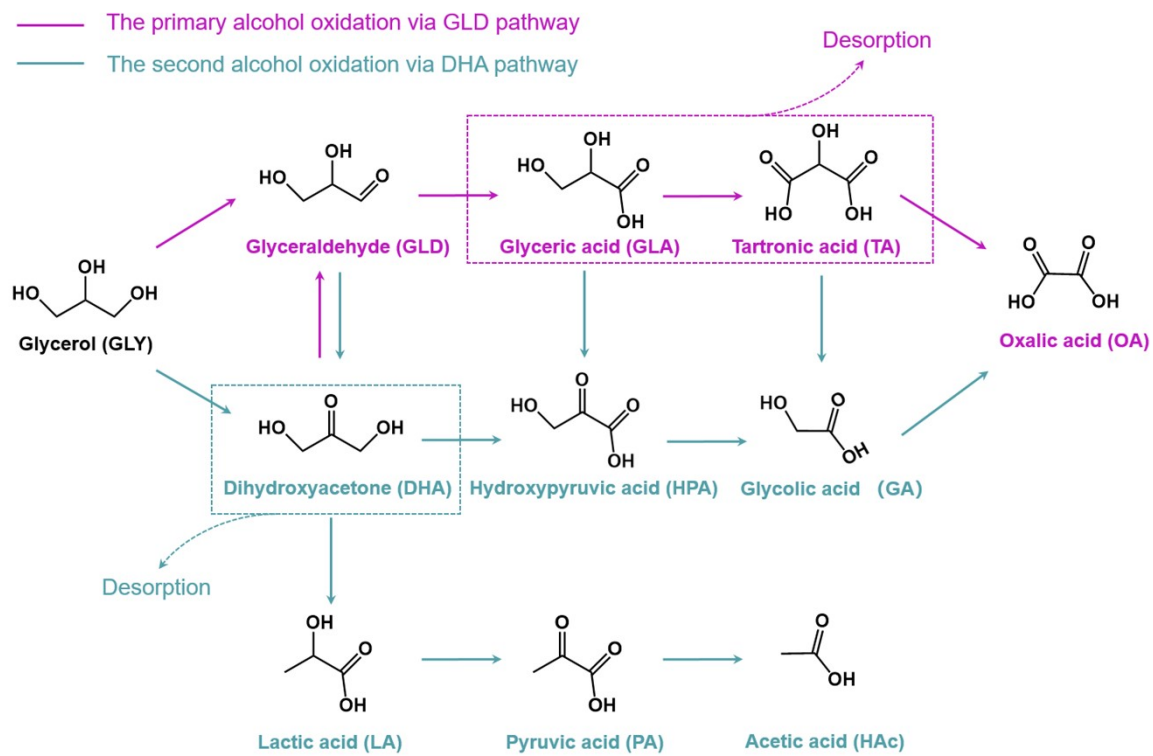

**Fig. S11** Possible reaction pathways for GOR on Bi<sub>1</sub>Pd NS.

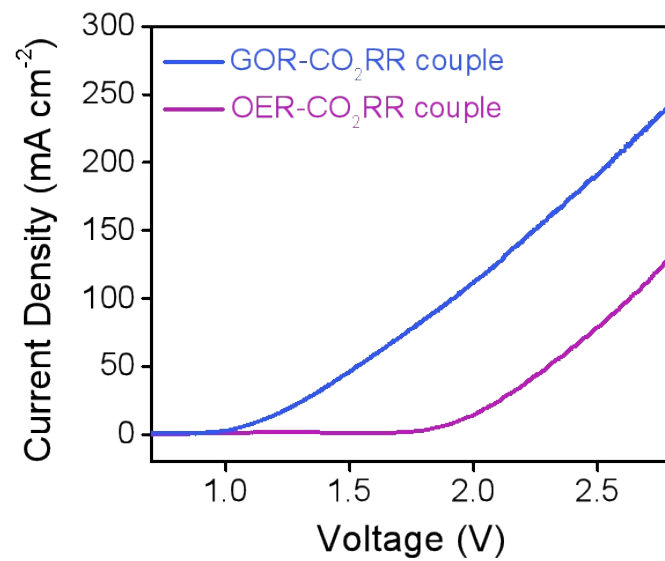

**Fig. S12** Polarization curves of GOR-CO<sub>2</sub>RR couple and OER-CO<sub>2</sub>RR couple in the two-electrode configuration.
